# Supplementary material for: Gene expression profiling at early organogenesis reveals both common and diverse mechanisms in foregut patterning
Source: PubMed Central journal article supplement — Dev Biol. 2011 Nov 15;359(2):163–75. doi: 10.1016/j.ydbio.2011.08.015 (PMC3206993; doi:10.1016/j.ydbio.2011.08.015), 2011-11-15
Supplement: mmc4.pdf [file mmc4.pdf]

## SUPPLEMENTAL INFORMATION

### Materials and methods

Clones and primer sequences for generation of ISH riboprobes

(*Gene name*: Forward primer; Reverse primer; Clone ID and company)

*4930426D05Rik*: SP6\_GCTGGGGACACCTTCGATTATCCG; T7\_AATCCATACCAGTGCCTCCTGGCC \*

*Bcl2*: SP6\_TTGTAATTCATCTGCCGCCG; T7\_GCAGGTACCAATGGCACTTCAA (n.6306635 OB)

*Cldn3*: SP6\_AGATGGGAGCTGGGTTGTA; T7\_TTCATGGTTTGCCTGTCTCT (n.4217040 OB)

*Crlf1*: SP6\_GACACACCTGGGGCCACCGC; T7\_CCCAACGCGGCTCACGTGC \*

*Cxcl12*: SP6\_AAGGCTGACATCCGTGGGAGATGC; T7\_AAGCAAAGGGAAGAGAGGGGAGGGG \*

*Iigp1*: SP6\_CTCTGCAATCAGTGATGCAT; T7\_TGGCTCAGCAATGCCATTCT (n.3483102 OB)

*Npnt*: SP6\_CAGTTATATAGGGTGGGC; T7\_CATCTTTGTGTCTCCTGG (n.30472074 OB)

*Prlr*: SP6\_TGCCTGTAGCAAGAAGAAGGGC; T7\_AAAGTCAGGTTCCGAGGAGGCT (n.3500076 OB)

*Slc4a4*: SP6\_ATGCTATCACTTTTGGAGGACTGC; T7\_CTTGGCACAATTAGTTTTGGGG \*

*Slc16a2*: SP6\_GTATTCCGCCAGCGCACTTACC; T7\_TGGCTCAGAGGAGATGGTCAGG (n.6313495 OB)

*Sorbs2*: SP6\_GCCCTGAACTTTGAAATGC; T7\_CACAATGCCAATGGTTACG \*

*Stc2*: SP6\_TACCCAGAACCATGTGTGC; T7\_AATCACACCGACGTTCTCC (n.3665803 OB)

*Tbx3*: SP6\_CTTCCCCCAAAGACACTTTCCCC; T7\_AGCGGGGCTGTCCGGGTGTATATA \*

*Tle2*: SP6\_TTCACCCTCTGTGCACCCTGTCCCC; T7\_GGCAAGGAGACAGACGAGCCTCGGA (n.5695461 Gene Service)

\* template synthesized using cDNA from E10.5 mouse embryo; OB denotes Open Biosystems.

### References for tables 1-3

Table 1. Hhex (Thomas et al., 1998), Pax8 (Plachov et al., 1990)

Table 2. Tmprss2 (Vaarala et al., 2001), Etv5 (Liu et al., 2003), Clic6 (Shaw et al., 2010), Foxa2 (Monaghan et al., 1993), Fgfr4 (Cardoso et al., 1997), Thbs1 (Liu and Hogan, 2002), Foxa1 (Monaghan et al., 1993), Wnt7b (Pepicelli et al., 1998), Sp5 (Sherwood et al., 2009), Thbd (Weiler-Guettler et al., 1996), Elf5 (Metzger et al., 2007), Hnf1b (Lokmane et al., 2008), Sema3c (Kagoshima and Ito, 2001).

Table 3. Cdh16 (Wertz and Herrmann, 1999), Cdh1 (Fagman et al., 2003), Alcam (Stephan et al., 1999), Epcam (Sherwood et al., 2009), Cldn6 (Anderson et al., 2008).

Anderson, W.J., Zhou, Q., Alcalde, V., Kaneko, O.F., Blank, L.J., Sherwood, R.I., Guseh, J.S., Rajagopal, J., Melton, D.A., 2008. Genetic targeting of the endoderm with claudin-6CreER. *Dev Dyn* 237, 504-512.

Cardoso, W.V., Itoh, A., Nogawa, H., Mason, I., Brody, J.S., 1997. FGF-1 and FGF-7 induce distinct patterns of growth and differentiation in embryonic lung epithelium. *Dev Dyn* 208, 398-405.

Fagman, H., Grande, M., Edsbacke, J., Semb, H., Nilsson, M., 2003. Expression of classical cadherins in thyroid development: maintenance of an epithelial phenotype throughout organogenesis. *Endocrinology* 144, 3618-3624.

Kagoshima, M., Ito, T., 2001. Diverse gene expression and function of semaphorins in developing lung: positive and negative regulatory roles of semaphorins in lung branching morphogenesis. *Genes Cells* 6, 559-571.

Liu, Y., Hogan, B.L., 2002. Differential gene expression in the distal tip endoderm of the embryonic mouse lung. *Gene Expr Patterns* 2, 229-233.

Liu, Y., Jiang, H., Crawford, H.C., Hogan, B.L., 2003. Role for ETS domain transcription factors Pea3/Erm in mouse lung development. *Dev Biol* 261, 10-24.

Lokmane, L., Haumaitre, C., Garcia-Villalba, P., Anselme, I., Schneider-Maunoury, S., Cereghini, S., 2008. Crucial role of vHNF1 in vertebrate hepatic specification. *Development (Cambridge, England)* 135, 2777-2786.

Metzger, D.E., Xu, Y., Shannon, J.M., 2007. Elf5 is an epithelium-specific, fibroblast growth factor-sensitive transcription factor in the embryonic lung. *Dev Dyn* 236, 1175-1192.

Monaghan, A.P., Kaestner, K.H., Grau, E., Schutz, G., 1993. Postimplantation expression patterns indicate a role for the mouse forkhead/HNF-3 alpha, beta and gamma genes in determination of the definitive endoderm, chordamesoderm and neuroectoderm. *Development (Cambridge, England)* 119, 567-578.

Pepicelli, C.V., Lewis, P.M., McMahon, A.P., 1998. Sonic hedgehog regulates branching morphogenesis in the mammalian lung. *Curr Biol* 8, 1083-1086.

- Plachov, D., Chowdhury, K., Walther, C., Simon, D., Guenet, J.L., Gruss, P., 1990. Pax8, a murine paired box gene expressed in the developing excretory system and thyroid gland. *Development (Cambridge, England)* 110, 643-651.
- Shaw, L., Johnson, P.A., Kimber, S.J., 2010. Gene expression profiling of the developing mouse kidney and embryo. *In Vitro Cell Dev Biol Anim* 46, 155-165.
- Sherwood, R.I., Chen, T.Y., Melton, D.A., 2009. Transcriptional dynamics of endodermal organ formation. *Dev Dyn* 238, 29-42.
- Stephan, J.P., Bald, L., Roberts, P.E., Lee, J., Gu, Q., Mather, J.P., 1999. Distribution and function of the adhesion molecule BEN during rat development. *Dev Biol* 212, 264-277.
- Thomas, P.Q., Brown, A., Beddington, R.S., 1998. Hex: a homeobox gene revealing peri-implantation asymmetry in the mouse embryo and an early transient marker of endothelial cell precursors. *Development (Cambridge, England)* 125, 85-94.
- Vaarala, M.H., Porvari, K.S., Kellokumpu, S., Kyllonen, A.P., Vihko, P.T., 2001. Expression of transmembrane serine protease TMPRSS2 in mouse and human tissues. *J Pathol* 193, 134-140.
- Weiler-Guettler, H., Aird, W.C., Rayburn, H., Husain, M., Rosenberg, R.D., 1996. Developmentally regulated gene expression of thrombomodulin in postimplantation mouse embryos. *Development (Cambridge, England)* 122, 2271-2281.
- Wertz, K., Herrmann, B.G., 1999. Kidney-specific cadherin (cdh16) is expressed in embryonic kidney, lung, and sex ducts. *Mech Dev* 84, 185-188.
